# Supplementary material for: Needle: a fast and space-efficient prefilter for estimating the quantification of very large collections of expression experiments
Source: PubMed Central journal article supplement (PMC9438961; doi:10.1093/bioinformatics/btac492), 2022-07-08
Supplement: btac492_supplementary_data.pdf [file btac492_supplementary_data.pdf]

## 6 Supplementary Information

### 6.1 Analysis

All analysis can be found here: [https://github.com/MitraDarja/analysis\\_needle](https://github.com/MitraDarja/analysis_needle).

#### 6.1.1 Accuracy

For the simulated data set, we used for Needle the thresholds: 5, 10, 15, 20, 30, 40, 60, 80, 120, 160, 240, 320, 400, 460, 520. For the SEQC data, Needle stored, similar to kallisto and Salmon, only minimizers that can be found in the human transcriptome (specified with the argument `-include`). No cutoff values were used for Needle or REINDEER in the accuracy analysis. For the exact commands, see above-mentioned repository.

#### 6.1.2 Speed and Space

The data set Needle was preprocessed with ‘needle minimiser’ and REINDEER with `bcalm2`, for this data set cutoffs as described above were used.

### 6.2 Results for a FPR of 0.3

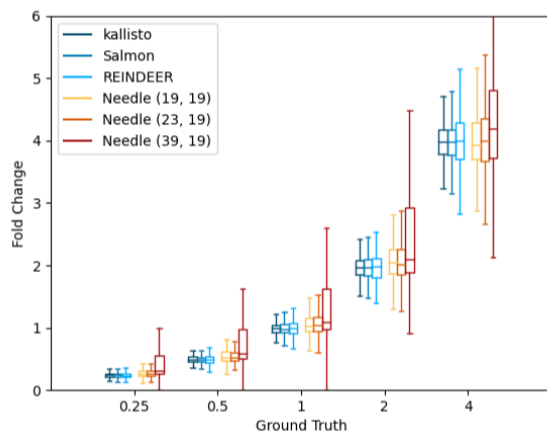

**Fig. 7.** Differential expression comparison of Needle, kallisto, Salmon and REINDEER for  $k = 19$  on the simulated data set. Needle  $(w, k)$  represents Needle based on  $(w, k)$ -minimizers. The values on the x-axis represent the ground truth, the expected fold change between differential expressed genes, while the y-axis presents the actual measured fold change. Needle was used with a false positive rate of 0.3.

|                 | SEQC | Microarray | MSE |
|-----------------|------|------------|-----|
| Needle (19, 19) | 80.2 | 76.9       | 0.5 |
| Needle (23, 19) | 79.5 | 75.4       | 0.6 |
| Needle (39, 19) | 60.1 | 57.6       | 1.3 |

**Table 4.** Needle results for  $k = 19$  and a FPR of 0.3 on the SEQC data set. Needle  $(w, k)$  represents Needle based on  $(w, k)$ -minimizers. SEQC represents the Spearman correlation in percent to the RT-PCR quantification, microarray the Spearman correlation in percent to the microarray quantification and MSE gives the mean square error of the titration monotonicity transcript-wise.

### 6.3 Disease Ontology analysis

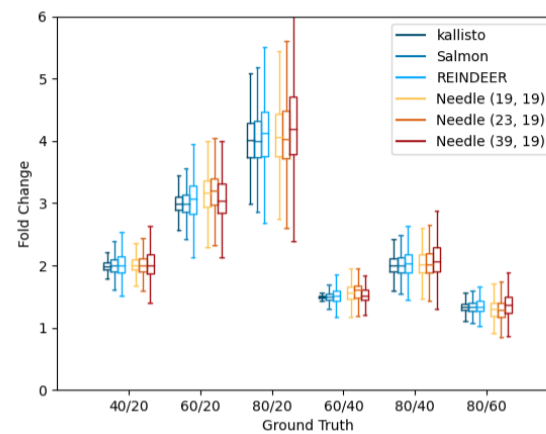

**Fig. 8.** Coverage comparison of Needle, kallisto, Salmon and REINDEER for  $k = 19$  on the simulated data set. Needle  $(w, k)$  represents Needle based on  $(w, k)$ -minimizers. The values on the x-axis represent the ground truth, the actual fold change between coverages, for example 40/20 stands for coverage 40 divided by coverage 20, while the y-axis represents the actual observed fold change between coverages. Needle was used with a false positive rate of 0.3.

|                 | Time      | RAM         | Index Size |
|-----------------|-----------|-------------|------------|
| Needle (21, 21) | 100 (108) | 17.4 (19.4) | 8.9 (11.7) |
| Needle (25, 21) | 31 (32)   | 5.5 (6.2)   | 2.8 (3.5)  |
| Needle (41, 21) | 6         | 1.4 (1.5)   | 0.7 (0.8)  |

**Table 5.** Needle Results for  $k = 21$  and a FPR of 0.3 on large real data set. Needle  $(w, k)$  represents Needle based on  $(w, k)$ -minimizers. Time is in minutes, RAM and Index size in GB. The index size in parentheses is the compressed size.

|      |      | Needle (21, 21) | Needle (25, 21) | Needle (41, 21) |
|------|------|-----------------|-----------------|-----------------|
| 1    | Time | 8 (20)          | 4 (8)           | 1 (3)           |
|      | RAM  | 4.4 (9.7)       | 1.4 (2.9)       | 0.3 (0.7)       |
| 100  | Time | 16 (33)         | 5 (12)          | 2 (3)           |
|      | RAM  | 4.4 (9.7)       | 1.4 (2.9)       | 0.3 (0.7)       |
| 1000 | Time | 119 (208)       | 40 (68)         | 11 (20)         |
|      | RAM  | 4.4 (9.7)       | 1.4 (2.9)       | 0.4 (0.7)       |

**Table 6.** Needle Results for  $k = 21$  and a FPR of 0.3 on the real large data set for 1/100/1000 sequence(s). Needle  $(w, k)$  represents Needle based on  $(w, k)$ -minimizers. Results in parentheses are for the compressed Needle version. Time is in seconds and RAM in GB.

|        | Diseases                                                                                                                                                                                      |
|--------|-----------------------------------------------------------------------------------------------------------------------------------------------------------------------------------------------|
| Blood  | Diamond-Blackfan anemia, Erythropoietic protoporphyria, Relapsing-remitting multiple sclerosis, Frontotemporal dementia, Lupus erythematosus, Cancer                                          |
| Brain  | Carcinoma, Melanoma, Kidney Cancer, Leber hereditary optic neuropathy, Ganglioglioma, Brain disease, Dementia, Toxic encephalopathy, Skin cancer, Liver cancer                                |
| Breast | Ductal carcinoma in situ, Bruck syndrome, Pachyonychia congenita, Epidermolysis bullosa, Pemphigus, Pleomorphic adenoma, Osteogenesis imperfecta, Ameloblastoma, Muscular dystrophy, Alopecia |

**Table 7.** Disease ontology for overexpressed genes between different tissues for the 1, 742 sequencing experiments.
